# Supplementary material
Source: publisher figshare collection journal article supplement (https://tandf.figshare.com/ndownloader/files/20153177)
Supplement: Supplementary file 1 [file 20153177]

Supplementary Table 1 Whole rock chemical analysis (%) and CIA、ICV values of the Neoproterozoic strata in the Aksu region

| Number (from top to bottom) | Formation | Al2O3 (%) | BaO (%) | CaO (%) | TFe2O3 (%) | K2O (%) | MgO (%) | MnO (%) | Na2O (%) | P2O5 (%) | SiO2 (%) | SrO (%) | TiO2 (%) | LOI (%) | Total (%) | CIA | ICV |
| --- | --- | --- | --- | --- | --- | --- | --- | --- | --- | --- | --- | --- | --- | --- | --- | --- | --- |
| 1 | Sugetbrak | 5.36 | 0.04 | 1.30 | 1.02 | 1.52 | 0.83 | 0.02 | 2.16 | 0.06 | 84.64 | 0.01 | 0.15 | 2.63 | 99.74 | 41.94 | 1.94 |
| 2 | Sugetbrak | 9.00 | 0.03 | 1.28 | 3.31 | 3.93 | 0.79 | 0.04 | 2.55 | 0.19 | 75.00 | 0.02 | 0.60 | 2.69 | 99.43 | 46.58 | 1.70 |
| 3 | Sugetbrak | 3.68 | 0.02 | 0.36 | 1.85 | 0.92 | 0.41 | 0.01 | 0.25 | 0.03 | 90.83 | 0.01 | 0.37 | 1.41 | 100.14 | 66.93 | 1.23 |
| 4 | Sugetbrak | 8.28 | 0.04 | 0.18 | 4.34 | 1.54 | 1.29 | 0.71 | 1.53 | 0.06 | 79.37 | 0.01 | 0.30 | 2.15 | 99.80 | 65.47 | 1.43 |
| 5 | Sugetbrak | 10.87 | 0.04 | 0.83 | 2.92 | 2.22 | 0.95 | 0.22 | 2.93 | 0.07 | 76.51 | 0.01 | 0.35 | 2.48 | 100.40 | 55.93 | 1.25 |
| 6 | Sugetbrak | 9.60 | 0.02 | 0.57 | 2.50 | 1.16 | 0.62 | 0.03 | 3.32 | 0.05 | 79.33 | 0.01 | 0.35 | 2.09 | 99.65 | 55.70 | 1.18 |
| 7 | Youermeinark | 14.74 | 0.16 | 0.36 | 4.62 | 2.74 | 1.86 | 0.07 | 3.08 | 0.11 | 68.79 | 0.02 | 0.65 | 3.07 | 100.27 | 63.63 | 1.15 |
| 8 | Youermeinark | 4.01 | 0.57 | 0.31 | 1.37 | 0.49 | 0.53 | 0.03 | 1.18 | 0.03 | 89.51 | 0.02 | 0.14 | 1.25 | 99.44 | 57.50 | 1.35 |
| 9 | Youermeinark | 4.83 | 0.08 | 0.25 | 1.88 | 0.54 | 0.85 | 0.04 | 1.18 | 0.03 | 88.00 | 0.01 | 0.15 | 1.69 | 99.53 | 62.42 | 1.35 |
| 10 | Youermeinark | 5.37 | 0.06 | 5.93 | 2.19 | 0.66 | 0.80 | 0.28 | 1.56 | 0.05 | 76.36 | 0.01 | 0.21 | 5.78 | 99.26 | 47.87 | 1.85 |
| 11 | Qiaoenbrak | 5.03 | 0.22 | 0.57 | 1.92 | 0.62 | 0.59 | 0.02 | 1.68 | 0.03 | 88.47 | 0.02 | 0.23 | 1.28 | 100.68 | 53.34 | 1.48 |
| 12 | Qiaoenbrak | 5.91 | 0.01 | 0.46 | 1.92 | 0.85 | 0.72 | 0.02 | 1.76 | 0.03 | 86.22 | 0.01 | 0.24 | 1.62 | 99.77 | 56.34 | 1.35 |
| 13 | Qiaoenbrak | 13.22 | 0.03 | 1.55 | 3.39 | 2.27 | 2.08 | 0.07 | 3.54 | 0.14 | 69.72 | 0.02 | 0.47 | 3.15 | 99.65 | 55.12 | 1.43 |
| 14 | Qiaoenbrak | 13.06 | 0.03 | 2.14 | 4.24 | 1.27 | 1.50 | 0.08 | 5.08 | 0.14 | 69.04 | 0.02 | 0.83 | 2.94 | 100.37 | 49.57 | 1.61 |
| 15 | Qiaoenbrak | 13.54 | 0.06 | 1.54 | 4.05 | 2.51 | 2.19 | 0.08 | 3.72 | 0.14 | 67.92 | 0.01 | 0.55 | 3.60 | 99.91 | 54.51 | 1.50 |
| 16 | Qiaoenbrak | 13.44 | 0.06 | 2.13 | 4.60 | 1.72 | 2.20 | 0.09 | 4.31 | 0.14 | 67.43 | 0.03 | 0.73 | 3.07 | 99.95 | 51.83 | 1.64 |
| 17 | Qiaoenbrak | 13.56 | 0.06 | 1.57 | 4.68 | 2.00 | 2.35 | 0.07 | 4.01 | 0.13 | 68.05 | 0.02 | 0.71 | 2.83 | 100.04 | 54.53 | 1.57 |
| 18 | Qiaoenbrak | 13.09 | 0.03 | 2.48 | 5.07 | 1.16 | 2.24 | 0.09 | 4.19 | 0.17 | 67.49 | 0.02 | 0.73 | 3.31 | 100.07 | 51.66 | 1.70 |
| 19 | Qiaoenbrak | 12.52 | 0.04 | 3.11 | 4.21 | 1.37 | 2.00 | 0.09 | 4.05 | 0.11 | 67.83 | 0.02 | 0.67 | 4.27 | 100.29 | 48.05 | 1.78 |
| 20 | Qiaoenbrak | 12.09 | 0.02 | 4.59 | 4.94 | 0.82 | 1.62 | 0.13 | 4.73 | 0.14 | 65.71 | 0.02 | 0.72 | 4.66 | 100.19 | 42.36 | 2.05 |
| 21 | Qiaoenbrak | 11.80 | 0.01 | 7.64 | 3.27 | 0.80 | 1.49 | 0.15 | 4.69 | 0.12 | 61.96 | 0.02 | 0.59 | 7.03 | 99.57 | 42.00 | 1.96 |
| 22 | Qiaoenbrak | 12.12 | 0.01 | 8.70 | 3.51 | 0.89 | 1.77 | 0.14 | 4.49 | 0.14 | 59.66 | 0.02 | 0.61 | 8.00 | 100.06 | 43.51 | 1.93 |
| 23 | Qiaoenbrak | 12.20 | 0.01 | 7.00 | 3.88 | 0.93 | 1.57 | 0.16 | 4.72 | 0.14 | 62.33 | 0.02 | 0.77 | 6.45 | 100.18 | 42.45 | 1.98 |
| 24 | Qiaoenbrak | 13.06 | 0.08 | 2.44 | 5.51 | 1.28 | 2.34 | 0.08 | 4.16 | 0.13 | 67.22 | 0.03 | 0.72 | 3.03 | 100.08 | 51.39 | 1.75 |
| 25 | Qiaoenbrak | 11.19 | 0.02 | 11.90 | 6.55 | 0.92 | 4.22 | 0.21 | 2.68 | 0.17 | 49.10 | 0.03 | 1.06 | 11.78 | 99.83 | 53.28 | 2.35 |
| 26 | Qiaoenbrak | 11.52 | 0.16 | 1.95 | 5.09 | 1.50 | 2.44 | 0.08 | 3.75 | 0.10 | 69.72 | 0.03 | 0.64 | 2.52 | 99.50 | 50.93 | 1.86 |
| 27 | Qiaoenbrak | 12.14 | 0.43 | 2.46 | 5.10 | 0.75 | 2.96 | 0.07 | 3.43 | 0.10 | 67.05 | 0.03 | 0.62 | 4.27 | 99.41 | 53.18 | 1.84 |
| 28 | Qiaoenbrak | 12.35 | 0.06 | 2.41 | 4.68 | 1.35 | 2.28 | 0.08 | 4.04 | 0.12 | 68.89 | 0.03 | 0.67 | 3.36 | 100.32 | 50.30 | 1.78 |
| 29 | Qiaoenbrak | 13.80 | 0.11 | 1.30 | 5.04 | 2.77 | 2.52 | 0.07 | 2.75 | 0.16 | 67.67 | 0.03 | 0.73 | 3.24 | 100.19 | 59.22 | 1.46 |
| 30 | Qiaoenbrak | 13.96 | 0.07 | 1.57 | 4.99 | 2.90 | 2.11 | 0.07 | 3.13 | 0.16 | 68.14 | 0.03 | 0.75 | 2.50 | 100.38 | 56.47 | 1.46 |
| 31 | Qiaoenbrak | 13.68 | 0.08 | 1.19 | 4.91 | 2.82 | 2.14 | 0.07 | 3.23 | 0.15 | 67.91 | 0.03 | 0.73 | 2.48 | 99.42 | 57.36 | 1.44 |
| 32 | Xifangshan | 13.94 | 0.07 | 1.44 | 4.40 | 1.74 | 2.24 | 0.07 | 4.33 | 0.14 | 67.90 | 0.03 | 0.70 | 2.83 | 99.83 | 55.25 | 1.49 |
| 33 | Xifangshan | 9.50 | 0.03 | 17.05 | 4.51 | 0.49 | 1.42 | 0.36 | 3.59 | 0.17 | 47.67 | 0.03 | 0.82 | 14.50 | 100.14 | 43.49 | 2.15 |
| 34 | Xifangshan | 9.65 | 0.03 | 17.55 | 4.48 | 0.53 | 1.48 | 0.40 | 3.53 | 0.14 | 46.08 | 0.02 | 0.85 | 15.14 | 99.88 | 44.19 | 2.12 |
| 35 | Xifangshan | 12.60 | 0.04 | 3.21 | 5.37 | 0.87 | 1.99 | 0.13 | 4.19 | 0.16 | 66.90 | 0.03 | 0.94 | 3.71 | 100.14 | 48.67 | 1.84 |
| 36 | Xifangshan | 13.98 | 0.06 | 2.99 | 5.45 | 1.18 | 2.27 | 0.10 | 4.94 | 0.17 | 64.84 | 0.03 | 0.77 | 3.43 | 100.21 | 49.20 | 1.77 |
| 37 | Xifangshan | 12.54 | 0.08 | 6.70 | 4.52 | 1.39 | 1.65 | 0.12 | 4.04 | 0.15 | 61.68 | 0.04 | 0.78 | 6.14 | 99.83 | 45.87 | 1.84 |
| 38 | Xifangshan | 13.46 | 0.05 | 4.08 | 5.62 | 1.63 | 2.60 | 0.11 | 3.52 | 0.21 | 62.28 | 0.04 | 0.72 | 5.04 | 99.36 | 50.21 | 1.83 |
| 39 | Xifangshan | 7.40 | 0.05 | 22.6 | 2.82 | 0.55 | 1.10 | 0.44 | 2.67 | 0.59 | 43.23 | 0.03 | 0.31 | 18.36 | 100.15 | 44.10 | 2.03 |
| 40 | Xifangshan | 7.64 | 0.02 | 27.5 | 3.29 | 0.76 | 1.22 | 0.80 | 2.38 | 0.39 | 32.52 | 0.03 | 0.34 | 22.85 | 99.74 | 46.89 | 2.02 |
| 41 | Xifangshan | 14.75 | 0.05 | 1.82 | 7.32 | 2.94 | 3.09 | 0.11 | 2.26 | 0.20 | 61.81 | 0.02 | 0.85 | 4.43 | 99.65 | 60.25 | 1.59 |
| 42 | Xifangshan | 8.47 | 0.11 | 21.0 | 3.57 | 1.24 | 1.37 | 0.60 | 2.14 | 0.36 | 42.91 | 0.02 | 0.45 | 17.98 | 100.22 | 50.26 | 1.84 |
| 43 | Xifangshan | 13.88 | 0.07 | 2.83 | 6.04 | 2.72 | 2.70 | 0.10 | 2.48 | 0.19 | 62.80 | 0.02 | 0.75 | 4.93 | 99.51 | 55.56 | 1.65 |
| 44 | Xifangshan | 12.68 | 0.05 | 8.28 | 5.07 | 1.90 | 2.22 | 0.34 | 3.24 | 0.19 | 57.09 | 0.03 | 0.77 | 8.33 | 100.19 | 49.93 | 1.82 |
| 45 | Xifangshan | 9.67 | 0.03 | 17.85 | 4.04 | 1.06 | 1.42 | 0.50 | 2.92 | 0.17 | 46.64 | 0.02 | 0.52 | 15.30 | 100.14 | 47.34 | 1.89 |
| 46 | Xifangshan | 13.75 | 0.07 | 2.32 | 6.42 | 1.55 | 2.93 | 0.11 | 3.84 | 0.18 | 64.15 | 0.03 | 0.68 | 4.41 | 100.44 | 53.85 | 1.77 |
| 47 | Xifangshan | 14.51 | 0.07 | 1.30 | 6.88 | 2.81 | 3.01 | 0.10 | 2.34 | 0.19 | 64.17 | 0.02 | 0.75 | 4.08 | 100.23 | 62.25 | 1.51 |
| 48 | Xifangshan | 16.60 | 0.03 | 0.81 | 6.98 | 3.21 | 3.01 | 0.05 | 2.38 | 0.18 | 61.61 | 0.01 | 0.83 | 3.90 | 99.60 | 66.32 | 1.30 |
| 49 | Xifangshan | 15.95 | 0.04 | 1.96 | 7.36 | 2.83 | 3.04 | 0.09 | 2.56 | 0.19 | 61.14 | 0.02 | 0.84 | 4.06 | 100.08 | 60.57 | 1.50 |
| 50 | Xifangshan | 6.40 | 0.01 | 28.1 | 4.50 | 0.74 | 1.65 | 0.48 | 1.13 | 0.17 | 32.79 | 0.02 | 0.28 | 23.56 | 99.83 | 58.61 | 1.97 |
| 51 | Xifangshan | 15.36 | 0.04 | 2.30 | 6.78 | 2.34 | 2.78 | 0.06 | 2.76 | 0.20 | 62.95 | 0.02 | 0.85 | 4.14 | 100.58 | 58.77 | 1.52 |
| 52 | Xifangshan | 14.12 | 0.10 | 0.93 | 2.14 | 3.55 | 0.50 | 0.03 | 4.77 | 0.07 | 72.02 | 0.02 | 0.34 | 1.06 | 99.65 | 51.66 | 1.16 |
| 53 | Xifangshan | 14.05 | 0.05 | 1.60 | 3.55 | 2.61 | 1.27 | 0.05 | 4.63 | 0.13 | 69.50 | 0.02 | 0.78 | 1.82 | 100.06 | 51.86 | 1.39 |
| 54 | Xifangshan | 13.48 | 0.05 | 1.46 | 3.52 | 2.52 | 1.21 | 0.05 | 4.54 | 0.11 | 70.76 | 0.03 | 0.84 | 1.46 | 100.03 | 51.71 | 1.41 |
| 55 | Xifangshan | 13.26 | 0.08 | 1.72 | 3.74 | 2.34 | 1.32 | 0.06 | 4.35 | 0.12 | 70.42 | 0.03 | 1.08 | 1.75 | 100.27 | 51.42 | 1.49 |
| 56 | Xifangshan | 13.42 | 0.06 | 1.96 | 3.74 | 2.46 | 1.33 | 0.06 | 4.31 | 0.13 | 69.42 | 0.03 | 1.07 | 1.94 | 99.93 | 50.78 | 1.51 |
| 57 | Xifangshan | 13.34 | 0.06 | 0.88 | 3.30 | 2.28 | 1.18 | 0.04 | 4.80 | 0.09 | 71.68 | 0.02 | 0.53 | 1.36 | 99.56 | 53.17 | 1.32 |
| 58 | Xifangshan | 13.41 | 0.06 | 1.26 | 2.97 | 2.37 | 1.28 | 0.04 | 4.63 | 0.09 | 71.39 | 0.03 | 0.51 | 1.70 | 99.74 | 52.24 | 1.35 |
| 59 | Xifangshan | 13.74 | 0.09 | 1.66 | 3.52 | 2.01 | 1.29 | 0.05 | 4.97 | 0.11 | 69.44 | 0.03 | 0.56 | 2.11 | 99.58 | 51.18 | 1.41 |
| 60 | Xifangshan | 13.66 | 0.08 | 1.38 | 3.39 | 2.10 | 1.25 | 0.05 | 4.88 | 0.10 | 71.01 | 0.03 | 0.62 | 1.94 | 100.49 | 52.08 | 1.37 |
| 61 | Xifangshan | 12.04 | 0.09 | 0.72 | 1.07 | 3.12 | 0.35 | 0.02 | 4.20 | 0.03 | 77.25 | 0.03 | 0.17 | 0.97 | 100.06 | 51.10 | 1.11 |
| 62 | Xifangshan | 13.84 | 0.08 | 2.19 | 4.11 | 2.73 | 1.78 | 0.07 | 4.38 | 0.10 | 67.44 | 0.03 | 0.54 | 2.65 | 99.94 | 49.89 | 1.58 |
| 63 | Xifangshan | 13.74 | 0.07 | 1.09 | 3.31 | 2.91 | 1.19 | 0.05 | 4.72 | 0.09 | 71.18 | 0.02 | 0.49 | 1.48 | 100.34 | 52.00 | 1.35 |
| 64 | Xifangshan | 13.68 | 0.07 | 1.05 | 3.43 | 2.91 | 1.20 | 0.05 | 4.64 | 0.10 | 70.35 | 0.02 | 0.51 | 1.76 | 99.77 | 52.35 | 1.35 |

Supplementary Table 2 Zircon U–Pb age data

| Analysis | RATIOS (common-Pb corrected) | | | | | | 238U/232Th | 1s | AGES (common-Pb corrected, Ma) | | | | | | Discordance |
| --- | --- | --- | --- | --- | --- | --- | --- | --- | --- | --- | --- | --- | --- | --- | --- |
| 207Pb/206Pb | 1s | 207Pb/235U | 1s | 206Pb/238U | 1s | 207Pb/206Pb | 1s | 207Pb/235U | 1s | 206Pb/238U | 1s |
| 16AK01 | | | | | | | | | | | | | | | |
| 16AK01-02 | 0.06982 | 0.00088 | 1.11834 | 0.0142 | 0.12225 | 0.00123 | 0.99 | 0.01 | 923 | 12 | 762 | 7 | 744 | 7 | 2.42% |
| 16AK01-03 | 0.06888 | 0.00089 | 1.14675 | 0.01484 | 0.12708 | 0.00129 | 1.19 | 0.01 | 895 | 12 | 776 | 7 | 771 | 7 | 0.65% |
| 16AK01-04 | 0.07002 | 0.00112 | 1.18684 | 0.01887 | 0.12937 | 0.00141 | 1.68 | 0.02 | 929 | 16 | 794 | 9 | 784 | 8 | 1.28% |
| 16AK01-05 | 0.0675 | 0.00085 | 1.16413 | 0.01463 | 0.13164 | 0.00133 | 1.28 | 0.01 | 853 | 12 | 784 | 7 | 797 | 8 | -1.63% |
| 16AK01-06 | 0.07068 | 0.00091 | 1.16427 | 0.01495 | 0.12574 | 0.00128 | 1.25 | 0.01 | 948 | 12 | 784 | 7 | 764 | 7 | 2.62% |
| 16AK01-07 | 0.06813 | 0.00087 | 1.13192 | 0.01442 | 0.12682 | 0.00128 | 1.01 | 0.01 | 873 | 12 | 769 | 7 | 770 | 7 | -0.13% |
| 16AK01-10 | 0.07051 | 0.00086 | 1.07563 | 0.01314 | 0.11644 | 0.00116 | 0.77 | 0.01 | 943 | 11 | 741 | 6 | 710 | 7 | 4.37% |
| 16AK01-11 | 0.06362 | 0.00249 | 1.02858 | 0.03859 | 0.11726 | 0.00133 | 0.91 | 0.01 | 729 | 85 | 718 | 19 | 715 | 8 | 0.42% |
| 16AK01-14 | 0.07153 | 0.00092 | 1.22532 | 0.01576 | 0.13075 | 0.00133 | 1.46 | 0.01 | 973 | 12 | 812 | 7 | 792 | 8 | 2.53% |
| 16AK01-15 | 0.06771 | 0.00283 | 1.29123 | 0.05158 | 0.1383 | 0.00167 | 0.93 | 0.01 | 860 | 89 | 842 | 23 | 835 | 9 | 0.84% |
| 16AK01-16 | 0.06953 | 0.0009 | 1.15489 | 0.01505 | 0.12678 | 0.00129 | 1.34 | 0.01 | 915 | 12 | 780 | 7 | 769 | 7 | 1.43% |
| 16AK01-17 | 0.06923 | 0.00086 | 1.18658 | 0.01487 | 0.13082 | 0.00131 | 1.01 | 0.01 | 906 | 12 | 794 | 7 | 793 | 7 | 0.13% |
| 16AK01-18 | 0.06984 | 0.00095 | 1.13868 | 0.01542 | 0.12445 | 0.00128 | 0.98 | 0.01 | 924 | 13 | 772 | 7 | 756 | 7 | 2.12% |
| 16AK01-21 | 0.07067 | 0.00094 | 1.2095 | 0.01609 | 0.13063 | 0.00134 | 1.34 | 0.01 | 948 | 13 | 805 | 7 | 791 | 8 | 1.77% |
| 16AK01-22 | 0.07264 | 0.00088 | 1.28183 | 0.01567 | 0.1347 | 0.00135 | 1.02 | 0.01 | 1004 | 11 | 838 | 7 | 815 | 8 | 2.82% |
| 16AK01-23 | 0.07557 | 0.00096 | 1.51972 | 0.01936 | 0.1535 | 0.00155 | 0.92 | 0.01 | 1084 | 12 | 938 | 8 | 921 | 9 | 1.85% |
| 16AK01-24 | 0.07003 | 0.00087 | 1.15648 | 0.01447 | 0.12604 | 0.00127 | 0.97 | 0.01 | 929 | 12 | 780 | 7 | 765 | 7 | 1.96% |
| 16AK01-26 | 0.06905 | 0.00086 | 1.14122 | 0.01425 | 0.12616 | 0.00127 | 1.21 | 0.01 | 900 | 12 | 773 | 7 | 766 | 7 | 0.91% |
| 16AK01-27 | 0.07081 | 0.00089 | 1.11731 | 0.01403 | 0.12044 | 0.00121 | 1.12 | 0.01 | 952 | 12 | 762 | 7 | 733 | 7 | 3.96% |
| 16AK01-28 | 0.07184 | 0.00104 | 1.21223 | 0.01748 | 0.1288 | 0.00136 | 0.98 | 0.01 | 981 | 14 | 806 | 8 | 781 | 8 | 3.20% |
| 16AK01-29 | 0.06911 | 0.00089 | 1.16245 | 0.01496 | 0.12839 | 0.0013 | 1.6 | 0.02 | 902 | 12 | 783 | 7 | 779 | 7 | 0.51% |
| 16AK01-31 | 0.07056 | 0.00088 | 1.09665 | 0.01374 | 0.11863 | 0.00119 | 1.07 | 0.01 | 945 | 12 | 752 | 7 | 723 | 7 | 4.01% |
| 16AK01-32 | 0.06902 | 0.00086 | 1.09777 | 0.0137 | 0.12141 | 0.00122 | 0.86 | 0.01 | 899 | 12 | 752 | 7 | 739 | 7 | 1.76% |
| 16AK01-35 | 0.07302 | 0.00094 | 1.41016 | 0.0182 | 0.14741 | 0.0015 | 1.24 | 0.01 | 1015 | 12 | 893 | 8 | 886 | 8 | 0.79% |
| 16AK01-36 | 0.07239 | 0.001 | 1.34348 | 0.01865 | 0.14165 | 0.00147 | 1.9 | 0.02 | 997 | 13 | 865 | 8 | 854 | 8 | 1.29% |
| 16AK01-38 | 0.06984 | 0.00089 | 1.26286 | 0.01611 | 0.13803 | 0.0014 | 1.7 | 0.02 | 924 | 12 | 829 | 7 | 834 | 8 | -0.60% |
| 16AK01-39 | 0.0695 | 0.00094 | 1.10621 | 0.01504 | 0.1215 | 0.00125 | 1.15 | 0.01 | 914 | 13 | 756 | 7 | 739 | 7 | 2.30% |
| 16AK01-40 | 0.07251 | 0.00094 | 1.36197 | 0.01774 | 0.14337 | 0.00146 | 1.02 | 0.01 | 1000 | 12 | 873 | 8 | 864 | 8 | 1.04% |
| 16AK01-41 | 0.06965 | 0.00089 | 1.2345 | 0.01586 | 0.13529 | 0.00137 | 1.2 | 0.01 | 918 | 12 | 816 | 7 | 818 | 8 | -0.24% |
| 16AK01-42 | 0.0744 | 0.00098 | 1.30013 | 0.01722 | 0.13338 | 0.00136 | 1.3 | 0.01 | 1052 | 12 | 846 | 8 | 807 | 8 | 4.83% |
| 16AK01-43 | 0.143 | 0.00174 | 7.6967 | 0.09423 | 0.41084 | 0.00413 | 1.72 | 0.02 | 2264 | 10 | 2196 | 11 | 2219 | 19 | 2.03% |
| 16AK01-45 | 0.071 | 0.00089 | 1.11177 | 0.01405 | 0.11952 | 0.00121 | 1.18 | 0.01 | 957 | 12 | 759 | 7 | 728 | 7 | 4.26% |
| 16AK01-47 | 0.06522 | 0.00212 | 1.16746 | 0.03575 | 0.12982 | 0.00143 | 1.2 | 0.01 | 781 | 70 | 785 | 17 | 787 | 8 | -0.25% |
| 16AK01-48 | 0.07075 | 0.00089 | 1.20228 | 0.01517 | 0.12972 | 0.00131 | 1.04 | 0.01 | 950 | 12 | 802 | 7 | 786 | 7 | 2.04% |
| 16AK01-49 | 0.06526 | 0.00227 | 1.15099 | 0.03791 | 0.12792 | 0.00143 | 1.07 | 0.01 | 783 | 75 | 778 | 18 | 776 | 8 | 0.26% |
| 16AK01-50 | 0.0682 | 0.00087 | 1.11455 | 0.01434 | 0.12474 | 0.00126 | 1.04 | 0.01 | 875 | 12 | 760 | 7 | 758 | 7 | 0.26% |
| 16AK01-51 | 0.0708 | 0.00092 | 1.25135 | 0.01634 | 0.13491 | 0.00137 | 1.1 | 0.01 | 952 | 12 | 824 | 7 | 816 | 8 | 0.98% |
| 16AK01-52 | 0.07222 | 0.00099 | 1.33507 | 0.01836 | 0.14111 | 0.00146 | 0.94 | 0.01 | 992 | 13 | 861 | 8 | 851 | 8 | 1.18% |
| 16AK01-56 | 0.07093 | 0.00108 | 1.14846 | 0.01749 | 0.12359 | 0.00132 | 1.4 | 0.01 | 955 | 15 | 777 | 8 | 751 | 8 | 3.46% |
| 16AK01-57 | 0.07556 | 0.00111 | 1.42625 | 0.02095 | 0.14408 | 0.00152 | 1.19 | 0.01 | 1083 | 14 | 900 | 9 | 868 | 9 | 3.69% |
| 16AK01-58 | 0.0737 | 0.00123 | 1.26141 | 0.02104 | 0.13064 | 0.00144 | 2.71 | 0.03 | 1033 | 17 | 829 | 9 | 792 | 8 | 4.67% |
| 16AK01-59 | 0.07254 | 0.00095 | 1.14476 | 0.01505 | 0.12046 | 0.00123 | 0.85 | 0.01 | 1001 | 12 | 775 | 7 | 733 | 7 | 5.73% |
| 16AK01-60 | 0.06974 | 0.00096 | 1.13754 | 0.0157 | 0.1245 | 0.00129 | 0.7 | 0.01 | 921 | 13 | 771 | 7 | 756 | 7 | 1.98% |
| 16AK01-61 | 0.06936 | 0.00089 | 1.17707 | 0.01515 | 0.12954 | 0.00131 | 0.88 | 0.01 | 909 | 12 | 790 | 7 | 785 | 7 | 0.64% |
| 16AK01-63 | 0.07369 | 0.00099 | 1.29065 | 0.01731 | 0.13369 | 0.00137 | 0.75 | 0.01 | 1033 | 13 | 842 | 8 | 809 | 8 | 4.08% |
| 16AK01-64 | 0.06996 | 0.0009 | 1.11996 | 0.01444 | 0.1222 | 0.00124 | 1.1 | 0.01 | 927 | 12 | 763 | 7 | 743 | 7 | 2.69% |
| 16AK01-65 | 0.06965 | 0.00099 | 1.11763 | 0.01592 | 0.12248 | 0.00128 | 2.94 | 0.03 | 918 | 14 | 762 | 8 | 745 | 7 | 2.28% |
| 16AK01-66 | 0.11075 | 0.00144 | 4.65054 | 0.06077 | 0.32052 | 0.00331 | 0.65 | 0.01 | 1812 | 11 | 1758 | 11 | 1792 | 16 | 1.12% |
| 16AK01-67 | 0.07022 | 0.00092 | 1.15684 | 0.01529 | 0.12576 | 0.00128 | 1.3 | 0.01 | 935 | 13 | 780 | 7 | 764 | 7 | 2.09% |
| 16AK01-68 | 0.06963 | 0.00091 | 1.18233 | 0.01546 | 0.12961 | 0.00132 | 1.21 | 0.01 | 917 | 12 | 792 | 7 | 786 | 8 | 0.76% |
| 16AK01-70 | 0.06832 | 0.00094 | 1.1557 | 0.01591 | 0.12913 | 0.00133 | 1.12 | 0.01 | 878 | 13 | 780 | 7 | 783 | 8 | -0.38% |
| 16AK01-74 | 0.07531 | 0.00095 | 1.51123 | 0.01925 | 0.15317 | 0.00155 | 1.53 | 0.02 | 1077 | 12 | 935 | 8 | 919 | 9 | 1.74% |
| 16AK02 | | | | | | | | | | | | | | | |
| 16AK02-01 | 0.07142 | 0.001 | 1.59785 | 0.0224 | 0.16227 | 0.00186 | 1.26 | 0.01 | 969 | 13 | 969 | 9 | 969 | 10 | 0.00% |
| 16AK02-02 | 0.0696 | 0.00103 | 1.46009 | 0.02176 | 0.15216 | 0.00177 | 0.61 | 0.01 | 917 | 14 | 914 | 9 | 913 | 10 | 0.11% |
| 16AK02-03 | 0.06936 | 0.00091 | 1.44413 | 0.01929 | 0.15102 | 0.0017 | 1.72 | 0.02 | 909 | 12 | 907 | 8 | 907 | 10 | 0.00% |
| 16AK02-04 | 0.06818 | 0.001 | 1.353 | 0.01972 | 0.14394 | 0.00167 | 1.05 | 0.01 | 874 | 14 | 869 | 9 | 867 | 9 | 0.23% |
| 16AK02-05 | 0.06856 | 0.00136 | 1.39228 | 0.0268 | 0.14728 | 0.00188 | 1.08 | 0.01 | 886 | 20 | 886 | 11 | 886 | 11 | 0.00% |
| 16AK02-06 | 0.06921 | 0.00113 | 1.43882 | 0.02318 | 0.15078 | 0.00179 | 0.98 | 0.01 | 905 | 16 | 905 | 10 | 905 | 10 | 0.00% |
| 16AK02-07 | 0.06968 | 0.00101 | 1.453 | 0.02099 | 0.15125 | 0.00175 | 0.96 | 0.01 | 919 | 14 | 911 | 9 | 908 | 10 | 0.33% |
| 16AK02-08 | 0.06946 | 0.00096 | 1.45826 | 0.02033 | 0.15227 | 0.00174 | 1.36 | 0.01 | 912 | 13 | 913 | 8 | 914 | 10 | -0.11% |
| 16AK02-10 | 0.07039 | 0.00093 | 1.52835 | 0.02049 | 0.15747 | 0.00178 | 1.23 | 0.01 | 940 | 12 | 942 | 8 | 943 | 10 | -0.11% |
| 16AK02-11 | 0.06942 | 0.00106 | 1.46456 | 0.02221 | 0.15302 | 0.00179 | 1.01 | 0.01 | 911 | 15 | 916 | 9 | 918 | 10 | -0.22% |
| 16AK02-12 | 0.07274 | 0.00099 | 1.73287 | 0.02367 | 0.17278 | 0.00196 | 2.27 | 0.02 | 1007 | 13 | 1021 | 9 | 1027 | 11 | -1.95% |
| 16AK02-13 | 0.06974 | 0.00102 | 1.4702 | 0.0215 | 0.1529 | 0.00176 | 0.76 | 0.01 | 921 | 14 | 918 | 9 | 917 | 10 | 0.11% |
| 16AK02-14 | 0.07233 | 0.00112 | 1.56226 | 0.02394 | 0.15666 | 0.00183 | 0.94 | 0.01 | 995 | 15 | 955 | 9 | 938 | 10 | 1.81% |
| 16AK02-15 | 0.07108 | 0.00098 | 1.50841 | 0.02094 | 0.15391 | 0.00175 | 2.09 | 0.02 | 960 | 13 | 934 | 8 | 923 | 10 | 1.19% |
| 16AK02-17 | 0.06864 | 0.00116 | 1.39283 | 0.02317 | 0.14716 | 0.00176 | 0.94 | 0.01 | 888 | 17 | 886 | 10 | 885 | 10 | 0.11% |
| 16AK02-18 | 0.0697 | 0.00114 | 1.48498 | 0.02405 | 0.15451 | 0.00183 | 0.74 | 0.01 | 920 | 16 | 924 | 10 | 926 | 10 | -0.22% |
| 16AK02-19 | 0.06964 | 0.00097 | 1.43986 | 0.02009 | 0.14994 | 0.00171 | 1.18 | 0.01 | 918 | 13 | 906 | 8 | 901 | 10 | 0.55% |
| 16AK02-20 | 0.06986 | 0.00094 | 1.51003 | 0.02049 | 0.15675 | 0.00177 | 1.41 | 0.01 | 924 | 13 | 934 | 8 | 939 | 10 | -0.53% |
| 16AK02-21 | 0.07099 | 0.00095 | 1.5665 | 0.02121 | 0.16003 | 0.00181 | 1.36 | 0.01 | 957 | 12 | 957 | 8 | 957 | 10 | 0.00% |
| 16AK02-22 | 0.07032 | 0.0011 | 1.48101 | 0.02293 | 0.15272 | 0.00179 | 0.9 | 0.01 | 938 | 15 | 923 | 9 | 916 | 10 | 0.76% |
| 16AK02-23 | 0.0724 | 0.00097 | 1.54206 | 0.02075 | 0.15446 | 0.00174 | 0.91 | 0.01 | 997 | 12 | 947 | 8 | 926 | 10 | 2.27% |
| 16AK02-24 | 0.06839 | 0.00096 | 1.40522 | 0.01974 | 0.14901 | 0.0017 | 1.4 | 0.01 | 880 | 13 | 891 | 8 | 895 | 10 | -0.45% |
| 16AK02-26 | 0.06484 | 0.00137 | 1.1148 | 0.02284 | 0.12468 | 0.00161 | 1.04 | 0.01 | 769 | 23 | 760 | 11 | 757 | 9 | 0.40% |
| 16AK02-27 | 0.07026 | 0.00106 | 1.51911 | 0.02283 | 0.15679 | 0.00182 | 0.78 | 0.01 | 936 | 14 | 938 | 9 | 939 | 10 | -0.11% |
| 16AK02-28 | 0.06968 | 0.00097 | 1.46053 | 0.02034 | 0.152 | 0.00173 | 0.65 | 0.01 | 919 | 13 | 914 | 8 | 912 | 10 | 0.22% |
| 16AK02-29 | 0.07381 | 0.00105 | 1.78001 | 0.02531 | 0.17489 | 0.00201 | 1.22 | 0.01 | 1036 | 13 | 1038 | 9 | 1039 | 11 | -0.29% |
| 16AK02-30 | 0.06728 | 0.00094 | 1.35007 | 0.01882 | 0.14551 | 0.00165 | 1.33 | 0.01 | 846 | 13 | 868 | 8 | 876 | 9 | -0.91% |
| 16AK02-32 | 0.06931 | 0.00096 | 1.40794 | 0.01947 | 0.14731 | 0.00167 | 1.53 | 0.02 | 908 | 13 | 892 | 8 | 886 | 9 | 0.68% |
| 16AK02-33 | 0.06746 | 0.00107 | 1.30242 | 0.02037 | 0.14001 | 0.00164 | 0.73 | 0.01 | 852 | 15 | 847 | 9 | 845 | 9 | 0.24% |
| 16AK02-34 | 0.06771 | 0.00111 | 1.32328 | 0.02138 | 0.14172 | 0.00168 | 0.88 | 0.01 | 860 | 16 | 856 | 9 | 854 | 9 | 0.23% |
| 16AK02-35 | 0.06934 | 0.00143 | 1.44987 | 0.0291 | 0.15162 | 0.0019 | 1.06 | 0.01 | 909 | 22 | 910 | 12 | 910 | 11 | 0.00% |
| 16AK02-36 | 0.06973 | 0.00111 | 1.52535 | 0.02403 | 0.15862 | 0.00186 | 0.96 | 0.01 | 920 | 15 | 941 | 10 | 949 | 10 | -0.84% |
| 16AK02-37 | 0.06966 | 0.0011 | 1.45139 | 0.02267 | 0.1511 | 0.00176 | 1.08 | 0.01 | 918 | 15 | 910 | 9 | 907 | 10 | 0.33% |
| 16AK02-38 | 0.06943 | 0.00095 | 1.45519 | 0.01995 | 0.15198 | 0.00171 | 1.39 | 0.01 | 912 | 13 | 912 | 8 | 912 | 10 | 0.00% |
| 16AK02-39 | 0.06786 | 0.00097 | 1.32819 | 0.01887 | 0.14192 | 0.00162 | 1.4 | 0.01 | 864 | 13 | 858 | 8 | 856 | 9 | 0.23% |
| 16AK02-41 | 0.06908 | 0.00112 | 1.43404 | 0.02286 | 0.15054 | 0.00176 | 0.79 | 0.01 | 901 | 16 | 903 | 10 | 904 | 10 | -0.11% |
| 16AK02-42 | 0.07071 | 0.00124 | 1.38634 | 0.02372 | 0.14217 | 0.00172 | 1.05 | 0.01 | 949 | 17 | 883 | 10 | 857 | 10 | 3.03% |
| 16AK02-43 | 0.06974 | 0.00116 | 1.48119 | 0.02425 | 0.154 | 0.00182 | 0.85 | 0.01 | 921 | 16 | 923 | 10 | 923 | 10 | 0.00% |
| 16AK02-44 | 0.07209 | 0.0013 | 1.64331 | 0.02875 | 0.16528 | 0.00205 | 0.99 | 0.01 | 988 | 17 | 987 | 11 | 986 | 11 | 0.10% |
| 16AK02-45 | 0.07155 | 0.0011 | 1.60343 | 0.02427 | 0.16248 | 0.00189 | 0.96 | 0.01 | 973 | 14 | 972 | 9 | 971 | 10 | 0.10% |
| 16AK02-46 | 0.06918 | 0.00104 | 1.46012 | 0.02166 | 0.15304 | 0.00176 | 0.94 | 0.01 | 904 | 14 | 914 | 9 | 918 | 10 | -0.44% |
| 16AK02-47 | 0.06851 | 0.00098 | 1.38711 | 0.01979 | 0.14682 | 0.00167 | 1.27 | 0.01 | 884 | 14 | 883 | 8 | 883 | 9 | 0.00% |
| 16AK02-48 | 0.06786 | 0.00116 | 1.36 | 0.02276 | 0.14531 | 0.00174 | 1.45 | 0.01 | 864 | 17 | 872 | 10 | 875 | 10 | -0.34% |
| 16AK02-49 | 0.06781 | 0.00162 | 1.31087 | 0.03012 | 0.14017 | 0.0019 | 1.01 | 0.01 | 863 | 26 | 851 | 13 | 846 | 11 | 0.59% |
| 16AK02-50 | 0.07034 | 0.00118 | 1.48082 | 0.02435 | 0.15264 | 0.00181 | 1.3 | 0.01 | 938 | 16 | 923 | 10 | 916 | 10 | 0.76% |
| 16AK02-51 | 0.06723 | 0.00117 | 1.29089 | 0.02191 | 0.13923 | 0.00169 | 1.22 | 0.01 | 845 | 17 | 842 | 10 | 840 | 10 | 0.24% |
| 16AK02-52 | 0.07031 | 0.0011 | 1.48726 | 0.02296 | 0.15338 | 0.00178 | 1.7 | 0.02 | 937 | 15 | 925 | 9 | 920 | 10 | 0.54% |
| 16AK02-53 | 0.06944 | 0.00113 | 1.45473 | 0.02318 | 0.15189 | 0.00179 | 0.74 | 0.01 | 912 | 16 | 912 | 10 | 912 | 10 | 0.00% |
| 16AK02-54 | 0.06973 | 0.00102 | 1.47454 | 0.02138 | 0.15332 | 0.00175 | 1.57 | 0.02 | 920 | 14 | 920 | 9 | 920 | 10 | 0.00% |
| 16AK02-55 | 0.07141 | 0.00126 | 1.5953 | 0.0274 | 0.16199 | 0.00198 | 0.9 | 0.01 | 969 | 17 | 968 | 11 | 968 | 11 | 0.00% |
| 16AK02-59 | 0.06946 | 0.00103 | 1.4578 | 0.02141 | 0.15217 | 0.00175 | 1.24 | 0.01 | 912 | 14 | 913 | 9 | 913 | 10 | 0.00% |
| 16AK02-60 | 0.06868 | 0.0013 | 1.40141 | 0.02572 | 0.14796 | 0.00182 | 1.02 | 0.01 | 889 | 19 | 890 | 11 | 890 | 10 | 0.00% |
| 16AK02-61 | 0.06877 | 0.00162 | 1.37395 | 0.03071 | 0.14485 | 0.00201 | 1.13 | 0.01 | 892 | 24 | 878 | 13 | 872 | 11 | 0.69% |
| 16AK02-62 | 0.07053 | 0.00104 | 1.53302 | 0.02233 | 0.15759 | 0.0018 | 1.6 | 0.02 | 944 | 14 | 944 | 9 | 943 | 10 | 0.11% |
| 16AK02-63 | 0.07204 | 0.0021 | 1.62374 | 0.04486 | 0.16342 | 0.00254 | 0.88 | 0.01 | 987 | 32 | 979 | 17 | 976 | 14 | 0.31% |
| 16AK02-64 | 0.06765 | 0.0015 | 1.31771 | 0.02839 | 0.14122 | 0.00177 | 1.32 | 0.01 | 858 | 25 | 854 | 12 | 852 | 10 | 0.23% |
| 16AK02-65 | 0.07169 | 0.0011 | 1.61094 | 0.02435 | 0.16293 | 0.00189 | 0.68 | 0.01 | 977 | 14 | 974 | 9 | 973 | 10 | 0.10% |
| 16AK02-66 | 0.07022 | 0.0012 | 1.51723 | 0.02528 | 0.15665 | 0.00188 | 0.83 | 0.01 | 935 | 16 | 937 | 10 | 938 | 10 | -0.11% |
| 16AK02-67 | 0.06938 | 0.00176 | 1.45254 | 0.03504 | 0.15179 | 0.00218 | 0.98 | 0.01 | 910 | 27 | 911 | 15 | 911 | 12 | 0.00% |
| 16AK02-68 | 0.06946 | 0.00118 | 1.45866 | 0.02409 | 0.15226 | 0.00182 | 0.89 | 0.01 | 912 | 16 | 913 | 10 | 914 | 10 | -0.11% |
| 16AK02-69 | 0.07432 | 0.00109 | 1.84467 | 0.02667 | 0.17997 | 0.00206 | 2.07 | 0.02 | 1050 | 13 | 1062 | 10 | 1067 | 11 | -1.59% |
| 16AK02-70 | 0.06754 | 0.00167 | 1.3199 | 0.03144 | 0.14168 | 0.00192 | 1.62 | 0.02 | 854 | 28 | 854 | 14 | 854 | 11 | 0.00% |
| 16AK02-74 | 0.07079 | 0.00108 | 1.49444 | 0.02239 | 0.15305 | 0.00177 | 1.13 | 0.01 | 951 | 14 | 928 | 9 | 918 | 10 | 1.09% |
| 16AK02-76 | 0.07028 | 0.00106 | 1.51193 | 0.0225 | 0.15596 | 0.00179 | 0.76 | 0.01 | 937 | 14 | 935 | 9 | 934 | 10 | 0.11% |
| 16AK02-77 | 0.06663 | 0.00289 | 1.20812 | 0.05007 | 0.1315 | 0.0017 | 1.04 | 0.01 | 826 | 93 | 804 | 23 | 796 | 10 | 1.01% |
| 16AK02-80 | 0.06916 | 0.00102 | 1.43269 | 0.0208 | 0.1502 | 0.00171 | 1.29 | 0.01 | 904 | 14 | 903 | 9 | 902 | 10 | 0.11% |
| 16AK02-81 | 0.06689 | 0.0014 | 1.27894 | 0.026 | 0.13862 | 0.00172 | 1.13 | 0.01 | 834 | 23 | 836 | 12 | 837 | 10 | -0.12% |
| 16AK02-83 | 0.06863 | 0.00125 | 1.398 | 0.02479 | 0.14768 | 0.00177 | 0.91 | 0.01 | 888 | 18 | 888 | 10 | 888 | 10 | 0.00% |
| 16AK02-84 | 0.06918 | 0.00146 | 1.44169 | 0.02921 | 0.15109 | 0.00194 | 1.38 | 0.01 | 904 | 22 | 906 | 12 | 907 | 11 | -0.11% |
| 16AK02-87 | 0.0699 | 0.00107 | 1.48364 | 0.02225 | 0.15389 | 0.00177 | 1.43 | 0.01 | 925 | 14 | 924 | 9 | 923 | 10 | 0.11% |
| 16AK02-88 | 0.07034 | 0.00106 | 1.52327 | 0.02246 | 0.15701 | 0.0018 | 1.79 | 0.02 | 938 | 14 | 940 | 9 | 940 | 10 | 0.00% |
| 16AK02-90 | 0.06777 | 0.00104 | 1.33653 | 0.02015 | 0.14298 | 0.00164 | 0.73 | 0.01 | 862 | 15 | 862 | 9 | 861 | 9 | 0.12% |
| 16AK02-91 | 0.06825 | 0.00105 | 1.3686 | 0.02061 | 0.14539 | 0.00167 | 1.44 | 0.01 | 876 | 15 | 876 | 9 | 875 | 9 | 0.11% |
| 16AK02-92 | 0.06797 | 0.00109 | 1.36656 | 0.02139 | 0.14577 | 0.00169 | 1.21 | 0.01 | 868 | 15 | 875 | 9 | 877 | 10 | -0.23% |
| 16AK02-93 | 0.07227 | 0.0011 | 1.66025 | 0.0248 | 0.16656 | 0.00191 | 1.32 | 0.01 | 994 | 14 | 993 | 9 | 993 | 11 | 0.00% |
| 16AK02-94 | 0.07027 | 0.00136 | 1.33243 | 0.02481 | 0.13747 | 0.00172 | 1.29 | 0.01 | 936 | 19 | 860 | 11 | 830 | 10 | 3.61% |
| 16AK02-95 | 0.07305 | 0.00138 | 1.45725 | 0.02649 | 0.14463 | 0.0018 | 1.07 | 0.01 | 1015 | 18 | 913 | 11 | 871 | 10 | 4.82% |
| 16AK02-96 | 0.07238 | 0.00118 | 1.50504 | 0.02381 | 0.15076 | 0.00177 | 2.24 | 0.02 | 997 | 15 | 932 | 10 | 905 | 10 | 2.98% |
| 16AK02-97 | 0.07064 | 0.00112 | 1.54629 | 0.02394 | 0.1587 | 0.00184 | 1.2 | 0.01 | 947 | 15 | 949 | 10 | 950 | 10 | -0.11% |
| 16AK02-98 | 0.07031 | 0.00118 | 1.37032 | 0.02229 | 0.1413 | 0.00167 | 0.93 | 0.01 | 937 | 16 | 876 | 10 | 852 | 9 | 2.82% |
| 16AK02-99 | 0.07422 | 0.00143 | 1.78129 | 0.03311 | 0.17399 | 0.00217 | 0.7 | 0.01 | 1047 | 19 | 1039 | 12 | 1034 | 12 | 1.26% |
| 16AK02-100 | 0.07042 | 0.00156 | 1.52704 | 0.03247 | 0.15722 | 0.00207 | 1.01 | 0.01 | 941 | 23 | 941 | 13 | 941 | 12 | 0.00% |
| 16AK02-101 | 0.07074 | 0.00149 | 1.54674 | 0.03114 | 0.15853 | 0.00208 | 0.75 | 0.01 | 950 | 21 | 949 | 12 | 949 | 12 | 0.00% |
| 16AK02-102 | 0.07039 | 0.00114 | 1.4694 | 0.02305 | 0.15135 | 0.00176 | 0.82 | 0.01 | 940 | 15 | 918 | 9 | 909 | 10 | 0.99% |
| 16AK02-103 | 0.07067 | 0.00127 | 1.54337 | 0.0267 | 0.15833 | 0.00192 | 0.8 | 0.01 | 948 | 17 | 948 | 11 | 947 | 11 | 0.11% |
| 16AK02-104 | 0.06999 | 0.00124 | 1.51494 | 0.02599 | 0.15692 | 0.00187 | 1.02 | 0.01 | 928 | 17 | 936 | 10 | 940 | 10 | -0.43% |
| 16AK02-107 | 0.06752 | 0.00109 | 1.3257 | 0.0208 | 0.14235 | 0.00165 | 1.7 | 0.02 | 854 | 16 | 857 | 9 | 858 | 9 | -0.12% |
| 16AK02-109 | 0.07137 | 0.00167 | 1.55693 | 0.03465 | 0.15816 | 0.00213 | 0.79 | 0.01 | 968 | 24 | 953 | 14 | 947 | 12 | 0.63% |
| 16AK02-110 | 0.06769 | 0.0012 | 1.32137 | 0.02251 | 0.14153 | 0.0017 | 1.51 | 0.02 | 859 | 17 | 855 | 10 | 853 | 10 | 0.23% |
| 16AK02-111 | 0.06827 | 0.00123 | 1.37025 | 0.0239 | 0.14552 | 0.00175 | 1.11 | 0.01 | 877 | 18 | 876 | 10 | 876 | 10 | 0.00% |
| 16AK02-112 | 0.07073 | 0.00123 | 1.56637 | 0.02637 | 0.16057 | 0.00192 | 0.89 | 0.01 | 950 | 17 | 957 | 10 | 960 | 11 | -0.31% |
| 16AK02-113 | 0.06986 | 0.00123 | 1.44663 | 0.02464 | 0.15012 | 0.0018 | 0.74 | 0.01 | 924 | 17 | 908 | 10 | 902 | 10 | 0.67% |
| 16AK02-114 | 0.07024 | 0.00113 | 1.45877 | 0.02273 | 0.15058 | 0.00174 | 1.46 | 0.01 | 935 | 15 | 914 | 9 | 904 | 10 | 1.11% |
| 16AK02-115 | 0.06881 | 0.00122 | 1.44153 | 0.02463 | 0.15188 | 0.00182 | 0.8 | 0.01 | 893 | 17 | 906 | 10 | 911 | 10 | -0.55% |
| 16AK02-116 | 0.07035 | 0.00115 | 1.45898 | 0.0231 | 0.15036 | 0.00175 | 1.38 | 0.01 | 939 | 15 | 914 | 10 | 903 | 10 | 1.22% |
| 16AK02-117 | 0.07028 | 0.0012 | 1.49962 | 0.02481 | 0.15471 | 0.00183 | 0.76 | 0.01 | 937 | 16 | 930 | 10 | 927 | 10 | 0.32% |
| 16AK02-118 | 0.07017 | 0.00133 | 1.48772 | 0.02714 | 0.15372 | 0.00186 | 0.93 | 0.01 | 933 | 19 | 925 | 11 | 922 | 10 | 0.33% |
| 16AK02-119 | 0.06954 | 0.00136 | 1.38291 | 0.02594 | 0.14419 | 0.0018 | 1.1 | 0.01 | 915 | 20 | 882 | 11 | 868 | 10 | 1.61% |
| 16AK02-120 | 0.07155 | 0.0012 | 1.39282 | 0.02258 | 0.14113 | 0.00166 | 1 | 0.01 | 973 | 16 | 886 | 10 | 851 | 9 | 4.11% |
| 16AK02-121 | 0.07201 | 0.00128 | 1.64235 | 0.02819 | 0.16536 | 0.00199 | 0.86 | 0.01 | 986 | 17 | 987 | 11 | 986 | 11 | 0.10% |
| 16AK02-123 | 0.07124 | 0.00122 | 1.58244 | 0.02613 | 0.16105 | 0.0019 | 1.1 | 0.01 | 964 | 16 | 963 | 10 | 963 | 11 | 0.00% |
| 16AK02-124 | 0.068 | 0.00116 | 1.33064 | 0.02189 | 0.14188 | 0.00167 | 1.08 | 0.01 | 869 | 17 | 859 | 10 | 855 | 9 | 0.47% |
| 16AK02-125 | 0.0691 | 0.00127 | 1.42481 | 0.02521 | 0.1495 | 0.00181 | 0.84 | 0.01 | 902 | 18 | 899 | 11 | 898 | 10 | 0.11% |
| 16AK02-126 | 0.0677 | 0.0014 | 1.31866 | 0.02606 | 0.14123 | 0.00178 | 1.23 | 0.01 | 859 | 21 | 854 | 11 | 852 | 10 | 0.23% |
| 16AK02-127 | 0.07073 | 0.00134 | 1.54868 | 0.02812 | 0.15876 | 0.00196 | 1.37 | 0.01 | 950 | 19 | 950 | 11 | 950 | 11 | 0.00% |
| 16AK02-128 | 0.07093 | 0.00129 | 1.57351 | 0.02746 | 0.16084 | 0.00195 | 1.39 | 0.01 | 955 | 18 | 960 | 11 | 961 | 11 | -0.10% |
| 16AK02-130 | 0.07154 | 0.00156 | 1.5537 | 0.03217 | 0.15748 | 0.00207 | 1.03 | 0.01 | 973 | 22 | 952 | 13 | 943 | 12 | 0.95% |
| 16AK02-133 | 0.07097 | 0.00129 | 1.53742 | 0.0267 | 0.15708 | 0.00189 | 2.47 | 0.02 | 957 | 18 | 945 | 11 | 941 | 11 | 0.43% |
| 16AK02-134 | 0.06911 | 0.00128 | 1.40514 | 0.02492 | 0.14741 | 0.00179 | 0.79 | 0.01 | 902 | 18 | 891 | 11 | 886 | 10 | 0.56% |
| 16AK02-135 | 0.06824 | 0.0031 | 1.20733 | 0.05237 | 0.12832 | 0.00171 | 1.36 | 0.01 | 876 | 96 | 804 | 24 | 778 | 10 | 3.34% |
| 16AK02-136 | 0.07517 | 0.00139 | 1.86461 | 0.033 | 0.17985 | 0.0022 | 0.88 | 0.01 | 1073 | 18 | 1069 | 12 | 1066 | 12 | 0.66% |
| 16AK02-137 | 0.06978 | 0.00128 | 1.41308 | 0.02484 | 0.14683 | 0.00178 | 0.93 | 0.01 | 922 | 18 | 894 | 10 | 883 | 10 | 1.25% |
| 16AK02-139 | 0.07016 | 0.00121 | 1.48475 | 0.02462 | 0.15345 | 0.00181 | 1.47 | 0.01 | 933 | 17 | 924 | 10 | 920 | 10 | 0.43% |
| 16AK02-140 | 0.07189 | 0.00127 | 1.65092 | 0.02805 | 0.16651 | 0.00199 | 1.17 | 0.01 | 983 | 17 | 990 | 11 | 993 | 11 | -0.30% |
| 16AK02-141 | 0.07231 | 0.00148 | 1.66891 | 0.03245 | 0.16734 | 0.00214 | 0.89 | 0.01 | 995 | 20 | 997 | 12 | 997 | 12 | 0.00% |
| 16AK02-142 | 0.07135 | 0.00147 | 1.60074 | 0.03135 | 0.16268 | 0.00206 | 1.05 | 0.01 | 967 | 21 | 970 | 12 | 972 | 11 | -0.21% |
| 16AK02-143 | 0.07169 | 0.00127 | 1.52423 | 0.02592 | 0.15417 | 0.00184 | 1.14 | 0.01 | 977 | 17 | 940 | 10 | 924 | 10 | 1.73% |
| 16AK02-144 | 0.07108 | 0.00128 | 1.56041 | 0.02686 | 0.15918 | 0.00191 | 1.3 | 0.01 | 960 | 17 | 955 | 11 | 952 | 11 | 0.32% |
| 16AK02-146 | 0.0709 | 0.00136 | 1.53952 | 0.02813 | 0.15746 | 0.00193 | 0.81 | 0.01 | 955 | 19 | 946 | 11 | 943 | 11 | 0.32% |
| 16AK02-147 | 0.06964 | 0.00138 | 1.48368 | 0.02793 | 0.1545 | 0.00193 | 1.34 | 0.01 | 918 | 20 | 924 | 11 | 926 | 11 | -0.22% |
| 16AK02-148 | 0.07079 | 0.00135 | 1.55279 | 0.02816 | 0.15905 | 0.00195 | 0.93 | 0.01 | 951 | 19 | 952 | 11 | 951 | 11 | 0.11% |
| 16AK02-149 | 0.06933 | 0.00148 | 1.44644 | 0.02935 | 0.15128 | 0.00192 | 0.93 | 0.01 | 909 | 22 | 908 | 12 | 908 | 11 | 0.00% |
| 16AK02-150 | 0.07048 | 0.00151 | 1.48135 | 0.03004 | 0.1524 | 0.00197 | 0.56 | 0.01 | 942 | 22 | 923 | 12 | 914 | 11 | 0.98% |
| 16AK02-151 | 0.07157 | 0.00156 | 1.55098 | 0.03204 | 0.15715 | 0.00205 | 0.89 | 0.01 | 974 | 22 | 951 | 13 | 941 | 11 | 1.06% |
| 16AK02-153 | 0.07071 | 0.00139 | 1.54363 | 0.02895 | 0.15829 | 0.00196 | 0.87 | 0.01 | 949 | 20 | 948 | 12 | 947 | 11 | 0.11% |
| 16AK02-155 | 0.06958 | 0.00158 | 1.45818 | 0.0314 | 0.15196 | 0.00199 | 0.94 | 0.01 | 916 | 24 | 913 | 13 | 912 | 11 | 0.11% |
| 16AK02-156 | 0.071 | 0.00129 | 1.51498 | 0.02622 | 0.15472 | 0.00185 | 1.37 | 0.01 | 957 | 18 | 936 | 11 | 927 | 10 | 0.97% |
| 16AK02-157 | 0.0695 | 0.00133 | 1.45802 | 0.02653 | 0.15213 | 0.00186 | 0.84 | 0.01 | 914 | 19 | 913 | 11 | 913 | 10 | 0.00% |
| 16AK02-161 | 0.06953 | 0.00137 | 1.45942 | 0.02721 | 0.1522 | 0.00188 | 1.17 | 0.01 | 915 | 19 | 914 | 11 | 913 | 11 | 0.11% |
| 16AK02-165 | 0.07004 | 0.00134 | 1.45835 | 0.02642 | 0.15101 | 0.00184 | 1.06 | 0.01 | 930 | 19 | 913 | 11 | 907 | 10 | 0.66% |
| 16AK02-167 | 0.07084 | 0.00138 | 1.56829 | 0.02898 | 0.16055 | 0.00197 | 1.03 | 0.01 | 953 | 19 | 958 | 11 | 960 | 11 | -0.21% |
| 16AK02-168 | 0.07028 | 0.00162 | 1.51728 | 0.03304 | 0.15656 | 0.00206 | 1.01 | 0.01 | 937 | 24 | 937 | 13 | 938 | 11 | -0.11% |
| 16AK02-169 | 0.0696 | 0.00162 | 1.27257 | 0.02786 | 0.1326 | 0.00177 | 0.9 | 0.01 | 917 | 24 | 834 | 12 | 803 | 10 | 3.86% |
| 16AK02-171 | 0.07095 | 0.00137 | 1.56627 | 0.02865 | 0.1601 | 0.00196 | 0.89 | 0.01 | 956 | 19 | 957 | 11 | 957 | 11 | 0.00% |
| 16AK02-172 | 0.07027 | 0.00146 | 1.50394 | 0.02963 | 0.15522 | 0.00195 | 0.95 | 0.01 | 936 | 21 | 932 | 12 | 930 | 11 | 0.22% |
| 16AK02-173 | 0.0702 | 0.00135 | 1.5027 | 0.02742 | 0.15524 | 0.00189 | 0.98 | 0.01 | 934 | 19 | 931 | 11 | 930 | 11 | 0.11% |
| 16AK02-174 | 0.07252 | 0.00145 | 1.68189 | 0.03179 | 0.1682 | 0.00209 | 0.68 | 0.01 | 1001 | 20 | 1002 | 12 | 1002 | 12 | -0.10% |
| 16AK02-175 | 0.06587 | 0.00432 | 1.14163 | 0.07313 | 0.12571 | 0.00179 | 0.77 | 0.01 | 802 | 141 | 773 | 35 | 763 | 10 | 1.31% |
| 16AK02-176 | 0.06839 | 0.00367 | 1.28041 | 0.06646 | 0.1358 | 0.00187 | 1.03 | 0.01 | 880 | 114 | 837 | 30 | 821 | 11 | 1.95% |
| 16AK03 | | | | | | | | | | | | | | | |
| 16AK03-01 | 0.0675 | 0.00126 | 1.31894 | 0.02466 | 0.14171 | 0.00184 | 1.03 | 0.01 | 853 | 19 | 854 | 11 | 854 | 10 | 0.00% |
| 16AK03-02 | 0.06923 | 0.0015 | 1.44033 | 0.03087 | 0.15087 | 0.00207 | 1.29 | 0.01 | 906 | 23 | 906 | 13 | 906 | 12 | 0.00% |
| 16AK03-03 | 0.06638 | 0.00098 | 1.23956 | 0.01883 | 0.13543 | 0.00168 | 1.41 | 0.01 | 818 | 14 | 819 | 9 | 819 | 10 | 0.00% |
| 16AK03-04 | 0.06897 | 0.00098 | 1.38773 | 0.02047 | 0.14591 | 0.00179 | 1.31 | 0.01 | 898 | 14 | 884 | 9 | 878 | 10 | 0.68% |
| 16AK03-06 | 0.07045 | 0.001 | 1.31203 | 0.0193 | 0.13506 | 0.00166 | 1.13 | 0.01 | 941 | 14 | 851 | 8 | 817 | 9 | 4.16% |
| 16AK03-07 | 0.06817 | 0.00106 | 1.36047 | 0.02171 | 0.14472 | 0.00181 | 1.22 | 0.01 | 874 | 15 | 872 | 9 | 871 | 10 | 0.11% |
| 16AK03-08 | 0.0672 | 0.00095 | 1.29593 | 0.01909 | 0.13985 | 0.00171 | 1.34 | 0.01 | 844 | 14 | 844 | 8 | 844 | 10 | 0.00% |
| 16AK03-09 | 0.06866 | 0.00244 | 1.27328 | 0.04202 | 0.1345 | 0.00178 | 1.37 | 0.01 | 888 | 75 | 834 | 19 | 814 | 10 | 2.46% |
| 16AK03-10 | 0.0682 | 0.00101 | 1.36798 | 0.02085 | 0.14545 | 0.0018 | 1.57 | 0.02 | 875 | 14 | 875 | 9 | 875 | 10 | 0.00% |
| 16AK03-11 | 0.06741 | 0.00261 | 1.16003 | 0.04202 | 0.1248 | 0.00169 | 1.34 | 0.01 | 851 | 82 | 782 | 20 | 758 | 10 | 3.17% |
| 16AK03-12 | 0.06551 | 0.00258 | 1.08614 | 0.04023 | 0.12025 | 0.00162 | 1.25 | 0.01 | 791 | 85 | 747 | 20 | 732 | 9 | 2.05% |
| 16AK03-13 | 0.06782 | 0.00107 | 1.33842 | 0.02157 | 0.14311 | 0.00179 | 1.61 | 0.02 | 863 | 16 | 863 | 9 | 862 | 10 | 0.12% |
| 16AK03-14 | 0.06652 | 0.00151 | 1.24886 | 0.02806 | 0.13613 | 0.00185 | 1.14 | 0.01 | 823 | 25 | 823 | 13 | 823 | 10 | 0.00% |
| 16AK03-15 | 0.06777 | 0.00097 | 1.33571 | 0.01992 | 0.14292 | 0.00175 | 1.13 | 0.01 | 862 | 14 | 861 | 9 | 861 | 10 | 0.00% |
| 16AK03-16 | 0.06779 | 0.00184 | 1.34372 | 0.03565 | 0.14373 | 0.00209 | 1.59 | 0.02 | 862 | 32 | 865 | 15 | 866 | 12 | -0.12% |
| 16AK03-17 | 0.06618 | 0.00108 | 1.2262 | 0.02039 | 0.13435 | 0.0017 | 1.4 | 0.01 | 812 | 16 | 813 | 9 | 813 | 10 | 0.00% |
| 16AK03-18 | 0.06794 | 0.00101 | 1.34817 | 0.02073 | 0.14388 | 0.00178 | 1.15 | 0.01 | 867 | 15 | 867 | 9 | 867 | 10 | 0.00% |
| 16AK03-19 | 0.07195 | 0.00112 | 1.38196 | 0.02187 | 0.13928 | 0.00174 | 1.18 | 0.01 | 985 | 15 | 881 | 9 | 841 | 10 | 4.76% |
| 16AK03-20 | 0.06714 | 0.00113 | 1.29356 | 0.02197 | 0.13971 | 0.00178 | 1.63 | 0.02 | 842 | 17 | 843 | 10 | 843 | 10 | 0.00% |
| 16AK03-21 | 0.06852 | 0.00114 | 1.39155 | 0.02345 | 0.14727 | 0.00188 | 1.27 | 0.01 | 884 | 16 | 885 | 10 | 886 | 11 | -0.11% |
| 16AK03-22 | 0.06747 | 0.00099 | 1.31628 | 0.0199 | 0.14147 | 0.00173 | 1.43 | 0.01 | 852 | 14 | 853 | 9 | 853 | 10 | 0.00% |
| 16AK03-23 | 0.06631 | 0.00097 | 1.24141 | 0.01875 | 0.13576 | 0.00167 | 2.01 | 0.02 | 816 | 14 | 820 | 8 | 821 | 9 | -0.12% |
| 16AK03-24 | 0.06713 | 0.00103 | 1.2911 | 0.02033 | 0.13947 | 0.00173 | 1.29 | 0.01 | 842 | 15 | 842 | 9 | 842 | 10 | 0.00% |
| 16AK03-25 | 0.06737 | 0.00151 | 1.29651 | 0.02861 | 0.13954 | 0.00191 | 1.27 | 0.01 | 849 | 24 | 844 | 13 | 842 | 11 | 0.24% |
| 16AK03-26 | 0.06717 | 0.00111 | 1.24072 | 0.02069 | 0.13393 | 0.0017 | 1.46 | 0.01 | 843 | 16 | 819 | 9 | 810 | 10 | 1.11% |
| 16AK03-27 | 0.06983 | 0.00112 | 1.48765 | 0.02422 | 0.15447 | 0.00194 | 0.98 | 0.01 | 923 | 16 | 925 | 10 | 926 | 11 | -0.11% |
| 16AK03-28 | 0.06696 | 0.00111 | 1.2837 | 0.02158 | 0.13901 | 0.00175 | 1.18 | 0.01 | 837 | 17 | 839 | 10 | 839 | 10 | 0.00% |
| 16AK03-29 | 0.06619 | 0.00104 | 1.22773 | 0.01966 | 0.13449 | 0.00167 | 1.18 | 0.01 | 812 | 16 | 813 | 9 | 813 | 9 | 0.00% |
| 16AK03-30 | 0.06877 | 0.00106 | 1.38758 | 0.02193 | 0.14631 | 0.00182 | 1.29 | 0.01 | 892 | 15 | 884 | 9 | 880 | 10 | 0.45% |
| 16AK03-31 | 0.06746 | 0.00105 | 1.2434 | 0.01978 | 0.13365 | 0.00166 | 1.15 | 0.01 | 852 | 15 | 820 | 9 | 809 | 9 | 1.36% |
| 16AK03-32 | 0.06647 | 0.00259 | 1.148 | 0.04209 | 0.12525 | 0.00167 | 1.25 | 0.01 | 821 | 83 | 776 | 20 | 761 | 10 | 1.97% |
| 16AK03-33 | 0.06669 | 0.001 | 1.2634 | 0.01952 | 0.13736 | 0.00169 | 1.18 | 0.01 | 828 | 15 | 829 | 9 | 830 | 10 | -0.12% |
| 16AK03-34 | 0.06672 | 0.00125 | 1.269 | 0.0237 | 0.13791 | 0.0018 | 1.54 | 0.02 | 829 | 19 | 832 | 11 | 833 | 10 | -0.12% |
| 16AK03-35 | 0.06515 | 0.00324 | 1.16351 | 0.05536 | 0.12952 | 0.00185 | 0.96 | 0.01 | 779 | 107 | 784 | 26 | 785 | 11 | -0.13% |
| 16AK03-37 | 0.06765 | 0.00129 | 1.32939 | 0.02517 | 0.14249 | 0.00185 | 1.46 | 0.01 | 858 | 20 | 859 | 11 | 859 | 10 | 0.00% |
| 16AK03-39 | 0.06727 | 0.0011 | 1.30392 | 0.02168 | 0.14054 | 0.00175 | 1.35 | 0.01 | 846 | 16 | 847 | 10 | 848 | 10 | -0.12% |
| 16AK03-41 | 0.06795 | 0.0013 | 1.34969 | 0.02572 | 0.14402 | 0.00186 | 1.18 | 0.01 | 867 | 20 | 867 | 11 | 867 | 10 | 0.00% |
| 16AK03-42 | 0.06539 | 0.00281 | 1.13081 | 0.04601 | 0.12542 | 0.00173 | 1.27 | 0.01 | 787 | 92 | 768 | 22 | 762 | 10 | 0.79% |
| 16AK03-45 | 0.06761 | 0.00177 | 1.3265 | 0.0341 | 0.14225 | 0.00201 | 2.1 | 0.02 | 857 | 31 | 857 | 15 | 857 | 11 | 0.00% |
| 16AK03-46 | 0.06773 | 0.00117 | 1.32998 | 0.02301 | 0.14238 | 0.00181 | 1.55 | 0.02 | 860 | 17 | 859 | 10 | 858 | 10 | 0.12% |
| 16AK03-47 | 0.06941 | 0.00114 | 1.44968 | 0.02397 | 0.15144 | 0.00191 | 1.05 | 0.01 | 911 | 16 | 910 | 10 | 909 | 11 | 0.11% |
| 16AK03-48 | 0.0671 | 0.00124 | 1.28814 | 0.02368 | 0.1392 | 0.00179 | 1 | 0.01 | 841 | 19 | 840 | 11 | 840 | 10 | 0.00% |
| 16AK03-49 | 0.07052 | 0.00139 | 1.47773 | 0.02877 | 0.15193 | 0.00204 | 0.99 | 0.01 | 944 | 20 | 921 | 12 | 912 | 11 | 0.99% |
| 16AK03-51 | 0.06648 | 0.00101 | 1.25634 | 0.01946 | 0.13703 | 0.00168 | 1.44 | 0.01 | 822 | 15 | 826 | 9 | 828 | 10 | -0.24% |
| 16AK03-52 | 0.0676 | 0.00103 | 1.31889 | 0.02044 | 0.14147 | 0.00174 | 1.37 | 0.01 | 856 | 15 | 854 | 9 | 853 | 10 | 0.12% |
| 16AK03-53 | 0.06727 | 0.00106 | 1.29866 | 0.02073 | 0.13999 | 0.00174 | 1.09 | 0.01 | 846 | 15 | 845 | 9 | 845 | 10 | 0.00% |
| 16AK03-54 | 0.07015 | 0.00119 | 1.40857 | 0.02394 | 0.1456 | 0.00185 | 1.04 | 0.01 | 933 | 16 | 893 | 10 | 876 | 10 | 1.94% |
| 16AK03-55 | 0.06742 | 0.00108 | 1.31148 | 0.0213 | 0.14104 | 0.00176 | 1.23 | 0.01 | 851 | 16 | 851 | 9 | 851 | 10 | 0.00% |
| 16AK03-56 | 0.06795 | 0.00117 | 1.34743 | 0.02331 | 0.14379 | 0.00182 | 0.73 | 0.01 | 867 | 17 | 866 | 10 | 866 | 10 | 0.00% |
| 16AK03-57 | 0.06649 | 0.0012 | 1.24666 | 0.0224 | 0.13596 | 0.00174 | 1.53 | 0.02 | 822 | 18 | 822 | 10 | 822 | 10 | 0.00% |
| 16AK03-58 | 0.0685 | 0.00108 | 1.19743 | 0.01909 | 0.12675 | 0.00157 | 0.96 | 0.01 | 884 | 15 | 799 | 9 | 769 | 9 | 3.90% |
| 16AK03-59 | 0.06769 | 0.00152 | 1.33011 | 0.02944 | 0.14247 | 0.00193 | 0.94 | 0.01 | 859 | 25 | 859 | 13 | 859 | 11 | 0.00% |
| 16AK03-61 | 0.07042 | 0.00121 | 1.52606 | 0.02618 | 0.15713 | 0.00199 | 0.8 | 0.01 | 941 | 17 | 941 | 11 | 941 | 11 | 0.00% |
| 16AK03-62 | 0.06767 | 0.00117 | 1.32847 | 0.02292 | 0.14235 | 0.0018 | 0.81 | 0.01 | 858 | 17 | 858 | 10 | 858 | 10 | 0.00% |
| 16AK03-63 | 0.06753 | 0.00122 | 1.31207 | 0.0235 | 0.14088 | 0.0018 | 0.76 | 0.01 | 854 | 18 | 851 | 10 | 850 | 10 | 0.12% |
| 16AK03-64 | 0.06716 | 0.00108 | 1.30175 | 0.0211 | 0.14054 | 0.00174 | 1.39 | 0.01 | 843 | 16 | 846 | 9 | 848 | 10 | -0.24% |
| 16AK03-65 | 0.06778 | 0.00135 | 1.23863 | 0.02423 | 0.13251 | 0.00177 | 1.97 | 0.02 | 862 | 20 | 818 | 11 | 802 | 10 | 2.00% |
| 16AK03-66 | 0.06662 | 0.00109 | 1.27369 | 0.02098 | 0.13862 | 0.00173 | 1.36 | 0.01 | 826 | 16 | 834 | 9 | 837 | 10 | -0.36% |
| 16AK03-68 | 0.1445 | 0.00224 | 8.47386 | 0.13285 | 0.4252 | 0.00527 | 1.13 | 0.01 | 2282 | 12 | 2283 | 14 | 2284 | 24 | -0.09% |
| 16AK03-69 | 0.06938 | 0.00124 | 1.45937 | 0.02588 | 0.15252 | 0.00195 | 1.48 | 0.01 | 910 | 18 | 914 | 11 | 915 | 11 | -0.11% |
| 16AK03-71 | 0.07042 | 0.00127 | 1.53275 | 0.02735 | 0.15783 | 0.00203 | 0.91 | 0.01 | 941 | 18 | 944 | 11 | 945 | 11 | -0.11% |
| 16AK03-72 | 0.06435 | 0.00222 | 1.12659 | 0.03588 | 0.12698 | 0.00166 | 2.23 | 0.02 | 753 | 74 | 766 | 17 | 771 | 10 | -0.65% |
| 16AK03-73 | 0.06872 | 0.00131 | 1.34895 | 0.02532 | 0.14234 | 0.00186 | 1.03 | 0.01 | 890 | 19 | 867 | 11 | 858 | 10 | 1.05% |
| 16AK03-74 | 0.06305 | 0.00301 | 1.05849 | 0.04847 | 0.12176 | 0.00166 | 1.18 | 0.01 | 710 | 104 | 733 | 24 | 741 | 10 | -1.08% |
| 16AK03-75 | 0.06799 | 0.00118 | 1.34523 | 0.02332 | 0.14347 | 0.00182 | 1.33 | 0.01 | 868 | 17 | 865 | 10 | 864 | 10 | 0.12% |
| 16AK03-76 | 0.0666 | 0.00128 | 1.25547 | 0.02379 | 0.1367 | 0.0018 | 0.83 | 0.01 | 825 | 19 | 826 | 11 | 826 | 10 | 0.00% |
| 16AK03-77 | 0.06736 | 0.0013 | 1.30707 | 0.02479 | 0.14071 | 0.00184 | 1.18 | 0.01 | 849 | 20 | 849 | 11 | 849 | 10 | 0.00% |
| 16AK03-78 | 0.06753 | 0.00116 | 1.3264 | 0.02271 | 0.14244 | 0.0018 | 1.23 | 0.01 | 854 | 17 | 857 | 10 | 858 | 10 | -0.12% |
| 16AK03-81 | 0.06851 | 0.00119 | 1.39222 | 0.024 | 0.14736 | 0.00187 | 1.26 | 0.01 | 884 | 17 | 886 | 10 | 886 | 11 | 0.00% |
| 16AK03-82 | 0.0678 | 0.00135 | 1.17562 | 0.02294 | 0.12574 | 0.00166 | 1.24 | 0.01 | 862 | 20 | 789 | 11 | 764 | 10 | 3.27% |
| 16AK03-83 | 0.06704 | 0.00118 | 1.28421 | 0.02234 | 0.1389 | 0.00176 | 1.36 | 0.01 | 839 | 17 | 839 | 10 | 838 | 10 | 0.12% |
| 16AK03-84 | 0.06831 | 0.00123 | 1.38957 | 0.02477 | 0.1475 | 0.00189 | 1.62 | 0.02 | 878 | 18 | 885 | 11 | 887 | 11 | -0.23% |
| 16AK03-85 | 0.06832 | 0.00137 | 1.38374 | 0.02712 | 0.14688 | 0.00194 | 1.62 | 0.02 | 878 | 20 | 882 | 12 | 883 | 11 | -0.11% |
| 16AK03-86 | 0.0652 | 0.0038 | 1.09191 | 0.06164 | 0.12146 | 0.00176 | 1.05 | 0.01 | 781 | 126 | 749 | 30 | 739 | 10 | 1.35% |
| 16AK03-87 | 0.06828 | 0.00133 | 1.36597 | 0.02612 | 0.14506 | 0.00189 | 0.95 | 0.01 | 877 | 20 | 874 | 11 | 873 | 11 | 0.11% |
| 16AK03-89 | 0.06782 | 0.00128 | 1.34348 | 0.02489 | 0.14366 | 0.00186 | 0.89 | 0.01 | 863 | 19 | 865 | 11 | 865 | 10 | 0.00% |
| 16AK03-90 | 0.07008 | 0.00146 | 1.34902 | 0.02749 | 0.1396 | 0.00186 | 1.19 | 0.01 | 931 | 21 | 867 | 12 | 842 | 11 | 2.97% |
| 16AK03-91 | 0.069 | 0.00133 | 1.39957 | 0.02637 | 0.14709 | 0.00193 | 1.15 | 0.01 | 899 | 19 | 889 | 11 | 885 | 11 | 0.45% |
| 16AK03-92 | 0.06827 | 0.00147 | 1.373 | 0.02864 | 0.14585 | 0.002 | 1.01 | 0.01 | 877 | 22 | 877 | 12 | 878 | 11 | -0.11% |
| 16AK03-93 | 0.0686 | 0.00123 | 1.15811 | 0.02047 | 0.12243 | 0.00156 | 1.04 | 0.01 | 887 | 18 | 781 | 10 | 745 | 9 | 4.83% |

Supplementary Table 3 Late Neoproterozoic - Early Paleozoic source rocks in the Aksu region

| Era | Formation | Lithology | Section Location  (as shown in Figure1) | Thickness/m | TOC/％Average | TOC/％Maximum | Reference |
| --- | --- | --- | --- | --- | --- | --- | --- |
| Ordovician | Yingan | Black Shale | Yingan | 97 | 0.61 | 2.1 | Xi et al., 2016 |
| Ordovician | Yingan | Black mudstone | Sishichang | 28 | 0.58 | 0.79 | Liu et al.,2012 |
| Ordovician | Yingan | Black Shale | Dawangou | 34 | 0.65 | 1.16 | Gao et al,,2010 |
| Ordovician | Yingan | Black Shale | East Dawangou | 97.7 |  |  | Gao et al,,2010 |
| Ordovician | Saergan | Black Shale | Dawangou | 13.4 | 2.88 | 5.5 | Gao et al,,2010 |
| Ordovician | Saergan | Black Shale | Yingan | 12 | 1.56 | 2.78 | Xi et al., 2016 |
| Ordovician | Saergan | Black mudstone | Sishichang | 19 | 1.45 | 2.93 | Liu et al.,2012 |
| Ordovician | Saergan | Black mudstone | Shuinichang | 4 |  |  | Gao et al,,2010 |
| Ordovician |  | Black mudstone | Well H3 |  | 0.93 | 1.99 | Zhang et al., 2001 |
| Ordovician |  | Black mudstone | North Tazhong |  | 0.43 | 5.43 | Zhang et al., 2001 |
| Early Cambrian | Yuertusi | Black mudstone | Kungaikuotan | 21 | 5.45 | 16.5 | Zhu et al., 2016 |
| Early Cambrian | Yuertusi | Black mudstone | Shiairik | 35 | 2.94 | 11.5 | Zhu et al., 2016 |
| Early Cambrian | Yuertusi | Black mudstone | Kule | 30 | 11.26 | 16.3 | Zhu et al., 2016 |
| Early Cambrian | Yuertusi | Black mudstone | Kuwati | 20 | 2.04 | 8.14 | Zhu et al., 2016 |
| Early Cambrian | Yuertusi | Black mudstone | Yutixi | 24 | 2.81 | 4.87 | Zhu et al., 2016 |
| Early Cambrian | Yuertusi | Black mudstone | Xiaoerbrak |  | 6.45 | 9.8 | Yu et al., 2005 |
| Early Cambrian | Yuertusi | Black mudstone | East Xiaoerbrak | 18 | 7.71 | 8.81 | Yang et al., 2016 |
| Early Cambrian | Yuertusi | Black mudstone | Sugetbrak | 16 | 0.85 | 2.37 | Zhu et al., 2016 |
| Early Cambrian | Yuertusi | Black mudstone | Well Xh1 | 33 | 5.5 | 9.43 | Zhu et al., 2014; Yang et al.,2016 |
